# Supplementary material for: An alpha-fetoprotein electrochemical immunosensor based on a carbon/gold bi-nanoparticle platform
Source: Royal Society of Chemistry journal article supplement (doi:10.1039/c8ay02360c), 2018-01-01
Supplement: c8ay02360c1.pdf [file c8ay02360c1.pdf]

## An alpha-feto protein electrochemical immunosensor based on a carbon/gold bi-nanoparticle platform

Azeez O Idris<sup>a</sup>, Nonhlangabezo Mabuba<sup>a,b</sup>, Omotayo A Arotiba<sup>a,b,\*</sup>

<sup>a</sup> Department of Applied Chemistry, University of Johannesburg, South Africa,

<sup>b</sup> Centre for Nanomaterials Science Research, University of Johannesburg, South Africa

### Supplementary Figures

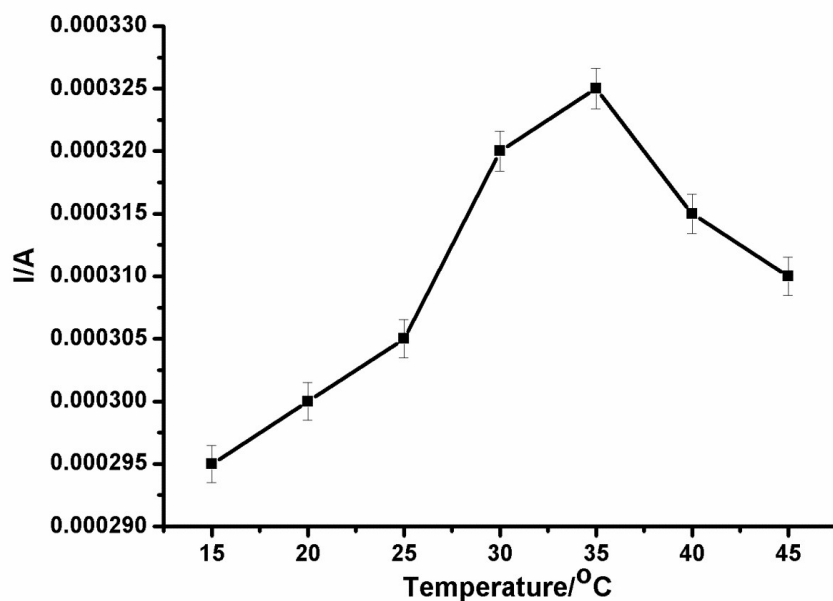

a)

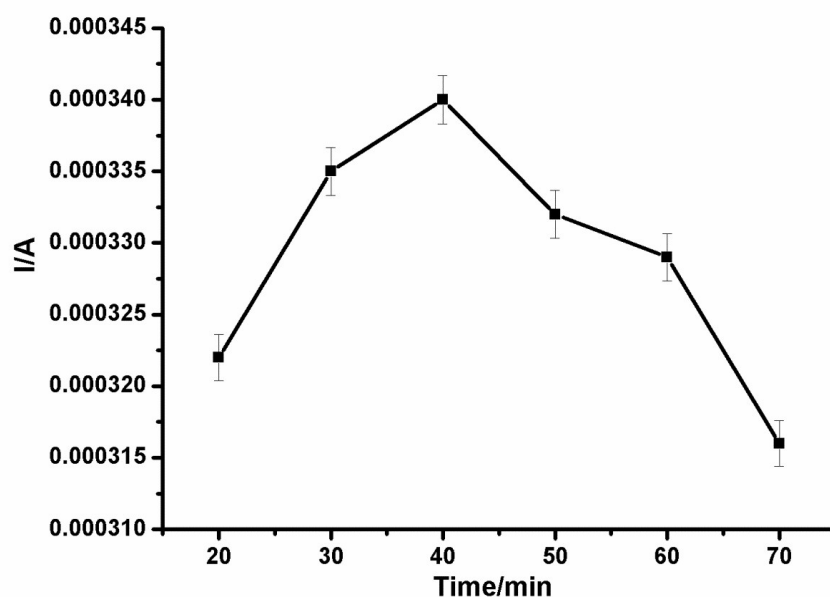

b)

Optimisation parameters of AFP detection Supp. Fig. (1a) Incubation Temperature (1b) Incubation Time.
